# Supplementary material for: Covalently Linking Oligomerization-Impaired GlpF Protomers Does Not Completely Re-establish Wild-Type Channel Activity
Source: MDPI journal article supplement (doi:10.3390/ijms20040927), 2019-02-20
Supplement: s1 [file s1]

# Covalently Linking Oligomerization-Impaired GlpF Protomers Does Not Completely Re-establish Wild-Type Channel Activity

Noreen Klein<sup>1,†</sup>, Margareta Trefz<sup>1,†</sup> and Dirk Schneider<sup>1,\*</sup>

<sup>1</sup> Johannes Gutenberg-University Mainz, Institute of Pharmacy and Biochemistry, Johann-Joachim-Becher-Weg 30, 55128 Mainz, Germany; noreen-klein@freenet.de (N.K.); martrefz@uni-mainz.de (M.T.)

\* Correspondence: Dirk.Schneider@uni-mainz.de; Tel.: +49 6131 39-25833 (D.S.)

† These authors contributed equally

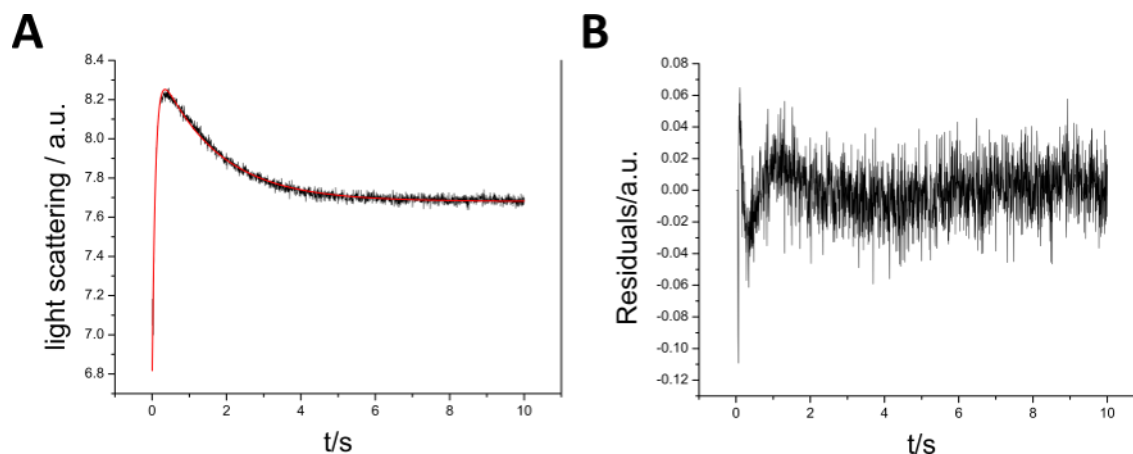

**Figure S1:** Light-scattering curve fitting.

(A) An example of a light-scattering curve is shown in black. Rapid mixing of GlpF with ribitol results in fast cell shrinking, visible as a steep increase of the light-scattering signal. The ribitol and water influx through GlpF is visible as the slow decay in light-scattering intensity. The applied single exponential fit is shown in red. (B) Distribution of residuals of the fit function shown in (A).

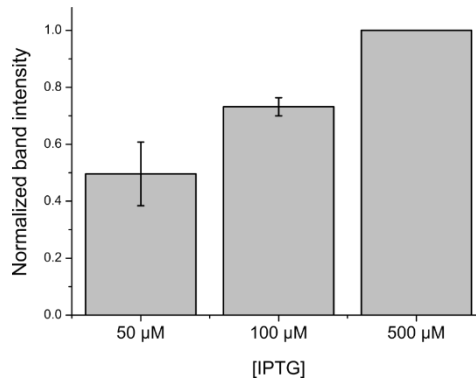

**Figure S2:** Densitometric analyses of the Western blots used for the determination of the wt<sub>4</sub> expression level at increasing [IPTG] (compare Figure 2 in the main text). The expression level of membrane-integrated GlpF increases with increasing [IPTG]. The intensity at 500 μM IPTG was set as 1.0 ( $n = 3 \pm \text{SD}$ ).

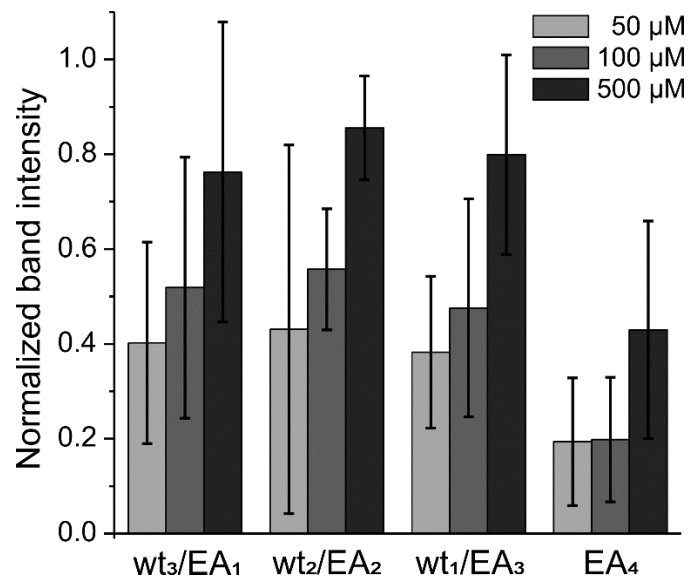

**Figure S3:** Densitometric analyses of the Western blots used for quantification of the expression level of fused GlpF heterooligomers (compare Figure 3 in the main article). The expression level of membrane-incorporated GlpF increases with increasing [IPTG] (different IPTG concentrations are shown in different gray tones). The intensity of the wt<sub>4</sub> construct at [IPTG] = 500 μM was set as 1.0. Note that the SD values are high at 50 and 100 μM IPTG. At [IPTG] = 500 μM, most heterooligomers show similar expression levels. Solely the expression level of EA<sub>4</sub> is reduced by 1.8 in comparison to wt<sub>4</sub> ( $n = 3 \pm \text{SD}$ ).

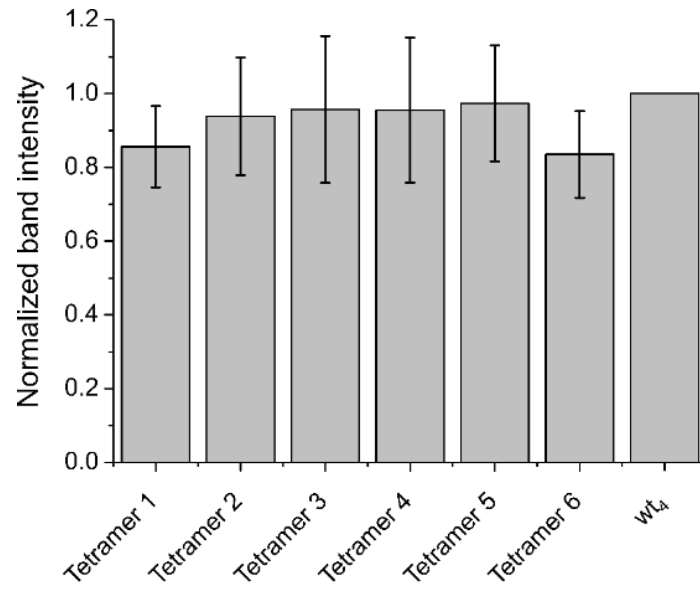

**Figure S4:** Densitometric analyses of the Western blots used for the determination of the expression level of the fused GlpF wt<sub>2</sub>/EA<sub>2</sub> permutations (compare Figure 5 in the main article). All produced heterooligomers have an expression level that is comparable to the GlpF wt<sub>4</sub> homooligomer, which was set as 1.0 ( $n = 3 \pm \text{SD}$ ).
